# Supplementary material for: Network analysis of hepatocellular carcinoma liquid biopsies augmented by single-cell sequencing data
Source: Front Genet. 2022 Aug 25;13:921195. doi: 10.3389/fgene.2022.921195 (PMC9452847; doi:10.3389/fgene.2022.921195)
Supplement: Supplementary file 3 [file DataSheet3.XLSX]

## Sheet: cf-blue
ID

## Sheet: cf-yellow
ID

## Sheet: cf-turquoise
ID

## Sheet: cf-red
ID

## Sheet: cf-brown
ID

## Sheet: cf-black
ID

## Sheet: cf-purple
ID

## Sheet: cf-magenta
ID
